## PUBLISHER'S NOTE

# Publisher's Note: ZNRF2 is released from membranes by growth factors and, together with ZNRF1, regulates the Na<sup>+</sup>/K<sup>+</sup>ATPase

**Gerta Hoxhaj, Ayaz Najafov, Rachel Toth, David G. Campbell, Alan R. Prescott and Carol MacKintosh**

There was an error in *J. Cell Sci.* (2012) **125**, 4662-4675 (doi:10.1242/jcs.110296).

A duplication of the bottom two GST blots in Fig. 2B occurred unintentionally during figure assembly. Chemiluminescence images from the same experiments show the GST controls are as expected, but these could not be used because they gave oversaturated signals, which is why the GST was developed using LICOR. The relevant LICOR GST blot is not available.

This error does not affect the results or the conclusion of this work. The specificities of the antibodies and the kinases that phosphorylate Ser19, Ser82 and Ser145 are sound, and are consistent with the mass spectrometric analyses of SILAC-labelled HEK293 cells (Table 1), the summary shown in Fig. S1 and *in vivo* phosphorylations (Fig. 2A, Fig. S2B–E), and the HPLC-Edman degradation analysis of *in vitro* phosphorylation of ZNRF2 by PKB $\alpha$ , SGK1, p90RSK and PKA (Fig. S2A).

The authors apologise for this error and any confusion caused.
